# Supplementary material for: Episodic Future Thinking as an Intervention for Alcohol Use Disorder: Effects on Delay Discounting and Real-World Alcohol Consumption
Source: Research Square preprint supplement (doi:10.21203/rs.3.rs-9182511/v1), 2026-04-03
Supplement: Supplementary file 1 [file 7e635316193ee097c9162865.docx]

**Supplemental Materials**

**Compensation structure**

Session payment:

Session 1 = $40

Session 2 = $45 (+$10 bonus depending on motion levels during fMRI scan)

Session 3 = $30

Session 4 = $45 (+$10 bonus depending on motion levels during fMRI scan)

Session 5 (One-Month Follow-Up) = $50

Remote monitoring payment:

$1 for daily drink count

$1 per BAC sample submission (3 per day)

$1 per answer to cue question (2 per day – monitoring phases 1 and 2 only)

**OR** $5 (during baseline monitoring)/$10 (during monitoring phases 1 and 2) if all self-report and submissions for the day are completed

Total compensation for remote monitoring up to: $315

Study completion bonus: $150

Total study compensation: ~$700

**Examples of long and short cues**

EFT Long cue: *“In 5 years, I get to be on vacation. I am with some of my closest friends from high school, and we are in a beautiful tropical location. We are laying on the beach while the sun is shining, chatting and reading books. I can hear the ocean waves in the background and smell the sea. I feel completely content.”*

EFT Short cue 1: *“In 5 years, Tropical vacation with friends.”*

CET Long cue: *“Yesterday between 4:00pm and 7:00pm, I was cooking dinner for my brothers. I was in the kitchen blackening hot dogs in the skillet with butter and the smelling the food as it cooked. I was regretting not having sliced pickles to go on my hotdogs but will still keep trying to find the perfect balance.”*

CET Short cue: *“Yesterday between 4:00pm and 7:00pm, The Great Hot Dog Event”*

Example of cue display during delay discounting and demand tasks:

**Example of cued delay discounting task**

Prior to the task, all participants were presented with the following instructions:

*In the following task, you will be asked to choose between receiving different amounts of money at different points in time.*

*These are hypothetical choices, but please choose your answers as if they were real. There are no right or wrong answers in this task, but please take your time and answer thoughtfully.*

*During each of these choices, you will imagine a specific event that you created. You will imagine the event in as much detail as possible.*

Example of the discounting task in the presence of the cues:


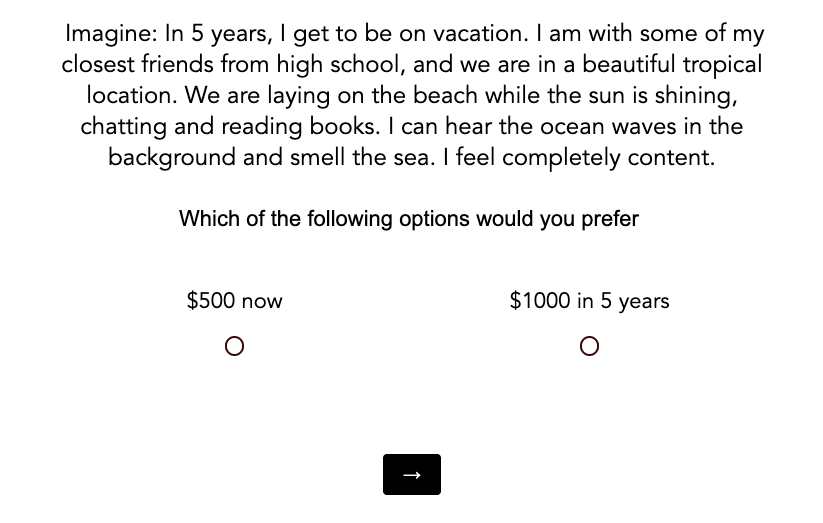


**Example of cued demand task**


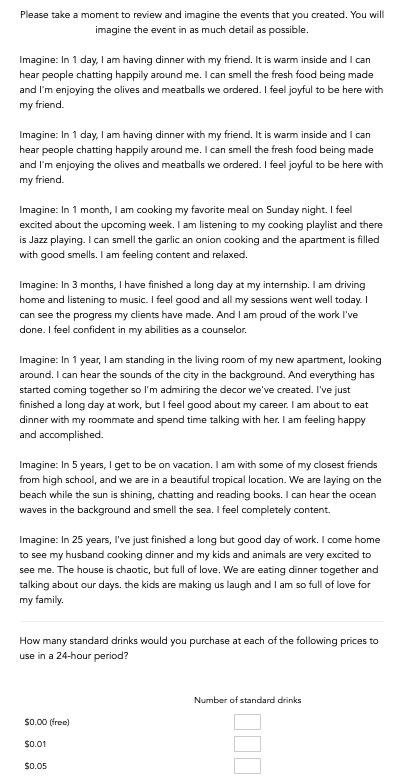


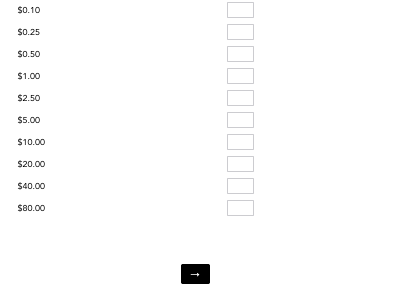


**List of questions that were sent with the daily cue reminders**

On a scale from 1-5, how vivid is this cue to you?

On a scale from 1-5, how much has this cue changed your day?

On a scale from 1-5, how meaningful is this cue to you?

On a scale from 1-5, how meaningless is this cue to you?

On a scale from 1-5, how much does this cue make you feel more in control?

On a scale from 1-5, how much does this cue make you feel less in control?

On a scale from 1-5, how much does this cue affect your mood?

On a scale from 1-5, how much does this cue improve your mood?

On a scale from 1-5, how real does this cue feel to you?

On a scale from 1-5, how unreal does this cue feel to you?

On a scale from 1-5, how much does this cue make you think about the future?

On a scale from 1-5, how relevant is this to you at this moment?

On a scale from 1-5, how irrelevant is this to you at this moment?

On a scale from 1-5, how often do you typically think about this cue on your own?

**Table S1**

*Phase length (Complete Case)*

| Phase | Mean (SD) | | Median (IQR) | |
| --- | --- | --- | --- | --- |
|  | EFT | CET | EFT | CET |
| BL | 12.96 (4.25) | 13.83 (4.54) | 12.50 (10.0, 15.00) | 13.50 (9.5, 18.0) |
| Phase1 | 18.28 (3.12) | 16.46 (2.02) | 17.00 (16.0, 20.00) | 16.00 (16.0, 17.00) |
| Phase2 | 18.85 (8.10) | 16.20 (3.81) | 15.50 (15.0, 22.00) | 15.00 (14.75, 16.25) |

*Note.* Mean and median number of days of each monitoring phase per group for the 52 participants who completed the entire intervention.

**Table S2**

*Phase length (Intention-to-Treat)*

| Phase | Mean (SD) | | Median (IQR) | |
| --- | --- | --- | --- | --- |
|  | EFT | CET | EFT | CET |
| BL | 12.84 (4.24) | 14.28 (4.54) | 12.00 (10.0, 15.00) | 15.00 (10.75, 18.0) |
| Phase1 | 17.82 (4.51) | 17.10 (3.84) | 17.00 (16.0, 20.00) | 16.00 (16.0, 17.25) |
| Phase2 | 18.60 (7.88) | 16.23 (3.97) | 15.50 (15.0, 21.75) | 15.00 (14.25, 16.75) |

*Note.* Mean and median number of days of each monitoring phase per group for the 61 participants who started the intervention.

**Table S3**

*Systematicity violation (Complete Case)*

| Session | %nonsystematic | | Bounce | | Trend | |
| --- | --- | --- | --- | --- | --- | --- |
|  | EFT | CET | EFT | CET | EFT | CET |
| S1 | 21.4 | 8.3 | 5 (17.8%) | 1 (4.2%) | 1 (3.6%) | 1 (4.2%) |
| S2 | 25.0 | 7.1 | 7 (25.0%) | 2 (7.1%) | 0 (0%) | 0 (0%) |
| S3 | 17.8 | 8.3 | 5 (17.8%) | 2 (8.3%) | 1 (3.6%) | 0 (0%) |
| S4 | 3.6 | 8.3 | 0 (0%) | 2 (8.3%) | 1 (3.6%) | 0 (0%) |
| S5 | 14.3 | 12.5 | 4 (14.3%) | 3 (12.5%) | 1 (3.6%) | 0 (0%) |

*Note.* Proportion of participants in each group who violated Johnson and Bickel’s (2008) bounce and/or trend criteria in each session. Percentages calculated based on the 52 participants who completed the entire study.

**Table S4**

*Systematicity violation (Intention-to-Treat)*

| Session | % nonsystematic | | Bounce | | Trend | |
| --- | --- | --- | --- | --- | --- | --- |
|  | EFT | CET | EFT | CET | EFT | CET |
| S1 | 18.2 | 7.1 | 5 (15.1%) | 1 (3.6%) | 1 (3.0%) | 1 (3.6%) |
| S2 | 21.2 | 14.3 | 7 (21.2%) | 4 (14.3%) | 0 (0%) | 0 (0%) |
| S3 | 16.1 | 7.7 | 5 (16.1%) | 2 (7.7%) | 1 (3.2%) | 1 (3.8%) |
| S4 | 3.3 | 8.3 | 0 (0%) | 2 (8.3%) | 1 (3.3%) | 0 (0%) |
| S5 | 14.3 | 12.5 | 4 (14.3%) | 3 (12.5%) | 1 (3.6%) | 0 (0%) |

*Note.* Proportion of participants in each group who violated Johnson and Bickel’s (2008) bounce and/or trend criteria in each session. Percentages calculated based on the 61 participants who started the intervention.

**Table S5.** Sample demographics

|  | EFT | CET |
| --- | --- | --- |
| n | 33 | 28 |
| Agea | 40.27 (13.35) | 36.61 (12.29) |
| Sex = Maleb | 21 (63.6) | 16 (57.1) |
| Ethnicity = NOT Hispanic or Latinob | 31 (93.9) | 26 (92.9) |
| Raceb |  |  |
| Asian | 0 (0.0) | 1 (3.6) |
| Black or African American | 5 (15.2) | 4 (14.3) |
| More Than One Race | 1 (3.0) | 1 (3.6) |
| Other | 0 (0.0) | 1 (3.6) |
| White | 27 (81.8) | 21 (75.0) |
| Educationb |  |  |
| High School (9+ years) | 20 (60.6) | 17 (60.7) |
| College (13+ years) | 6 (18.2) | 4 (14.3) |
| Graduate School (17+ years) | 7 (21.2) | 7 (25.0) |
| Employmentb |  |  |
| Retired | 1 (3.0) | 3 (11.1) |
| Unemployed | 3 (9.1) | 2 (7.4) |
| Working full time | 22 (66.7) | 13 (48.1) |
| Working part-time | 7 (21.2) | 9 (33.3) |
| Incomeb |  |  |
| Less than $5,000 | 4 (12.1) | 2 (7.1) |
| $5,000 through $24,999 | 8 (24.2) | 7 (25.0) |
| $25,000 through $49,999 | 8 (24.2) | 8 (28.6) |
| $50,000 through $74,999 | 4 (12.1) | 4 (14.3) |
| $75,000 through $99,999 | 5 (15.2) | 2 (7.1) |
| $100,000 and greater | 4 (12.1) | 4 (14.3) |
| No response | 0 (0.0) | 1 (3.6) |
| Baseline DD rate (ln(k))a | -4.80 (2.53) | -5.18 (2.52) |
| AUDITa | 24.79 (4.97) | 22.07 (3.92) |
| AUD scorea | 7.70 (2.46) | 8.14 (2.48) |
| Cannabis Use Disorder | 0.94 (2.00) | 1.43 (2.53) |
| Tobacco Use Disorder | 1.47 (2.87) | 1.22 (2.69) |
| Opioid Use Disorder (Mild) | 0.06 (0.35) | 0.04 (0.19) |
| Stimulants Use Disorder (Mild) | 0.09 (0.38) | 0.04 (0.19) |
| Cocaine Use Disorder (Mild) | 0.21 (0.74) | 0.00 (0.00) |
| Baseline drinks/daya | 5.07 (2.11) | 5.60 (2.28) |

*Note:* aMean (SD); bCount (%)

**Table S6**

*Estimates for the models on ln(k)*

|  | **Complete Case** | | | | | |  | **Intention to Treat** | | | | | |
| --- | --- | --- | --- | --- | --- | --- | --- | --- | --- | --- | --- | --- | --- |
|  | Coef. | SE | 95% LCI | 95% UCI | *p* | Cohen’s f |  | Coef. | SE | 95% LCI | 95% UCI | *p* | Cohen’s f |
| Group, Ref = CET | 0.47 | 0.63 | -0.75 | 1.70 | .45 | 0.19 |  | 0.59 | 0.60 | -0.58 | 1.77 | .33 | 0.07 |
| Session, Ref = S1 |  |  |  |  |  | 0.24 |  |  |  |  |  |  | 0.24 |
| S2 | 0.28 | 0.41 | -0.51 | 1.08 | .48 |  |  | 0.13 | 0.38 | -0.61 | 0.88 | .73 |  |
| S3 | 0.28 | 0.41 | -0.51 | 1.08 | .49 |  |  | -0.01 | 0.39 | -0.78 | 0.75 | .97 |  |
| S4 | -0.11 | 0.41 | -0.91 | 0.68 | .78 |  |  | -0.20 | 0.40 | -0.99 | 0.59 | .62 |  |
| S5 | -0.03 | 0.41 | -0.82 | 0.77 | .95 |  |  | -0.11 | 0.40 | -0.90 | 0.68 | .78 |  |
| Group X Session |  |  |  |  |  | 0.35 |  |  |  |  |  |  | 0.28 |
| EFT & S2 | -2.00 | 0.55 | -3.09 | -0.92 | <.001*** |  |  | -1.62 | 0.52 | -2.64 | -0.60 | <.01** |  |
| EFT & S3 | -2.12 | 0.55 | -3.21 | -1.04 | <.001*** |  |  | -1.59 | 0.53 | -2.63 | -0.55 | <.01** |  |
| EFT & S4 | -0.26 | 0.55 | -1.34 | 0.83 | .64 |  |  | -0.10 | 0.54 | -1.16 | 0.97 | .86 |  |
| EFT & S5 | -0.99 | 0.55 | -2.08 | 0.09 | .07 |  |  | -0.78 | 0.55 | -1.85 | 0.29 | .15 |  |
| Age | 0.02 | 0.02 | -0.03 | 0.06 | .43 | 0.13 |  | 0.03 | 0.02 | -0.02 | 0.07 | .26 | 0.17 |
| Sex, Ref = Female | -0.15 | 0.53 | -1.19 | 0.88 | .78 | 0.05 |  | 0.06 | 0.51 | -0.95 | 1.07 | .91 | 0.02 |
| AUDIT Score | -0.01 | 0.07 | -0.15 | 0.12 | .87 | 0.03 |  | -0.02 | 0.06 | -0.15 | 0.11 | .75 | 0.05 |
| Education, Ref = High School (9+ years) |  |  |  |  |  | 0.55 |  |  |  |  |  |  | 0.49 |
| College (13+ years) | -2.38 | 0.73 | -3.81 | -0.95 | <.01** |  |  | -2.19 | 0.68 | -3.53 | -0.85 | <.01** |  |
| Graduate School (17+ years) | -2.73 | 0.95 | -4.59 | -0.86 | <.01** |  |  | -2.63 | 0.94 | -4.48 | -0.79 | <.01** |  |
| Income, Ref = Less than $5,000 |  |  |  |  |  | 0.46 |  |  |  |  |  |  | 0.46 |
| $5,000 - $24,999 | 0.33 | 0.91 | -1.46 | 2.11 | .72 |  |  | 0.44 | 0.90 | -1.33 | 2.21 | .63 |  |
| $25,000 - $49,999 | 0.31 | 0.86 | -1.37 | 1.98 | .72 |  |  | 0.39 | 0.88 | -1.34 | 2.11 | .66 |  |
| $50,000 - $74,999 | -0.19 | 0.98 | -2.11 | 1.74 | .85 |  |  | -0.61 | 1.01 | -2.59 | 1.37 | .55 |  |
| $75,000 -$99,999 | 0.40 | 1.02 | -1.60 | 2.39 | .70 |  |  | 0.15 | 1.03 | -1.87 | 2.17 | .89 |  |
| $100,000 + | -0.58 | 1.05 | -2.64 | 1.48 | .58 |  |  | -0.71 | 1.09 | -2.84 | 1.42 | .52 |  |
| No response | 4.68 | 1.88 | 0.99 | 8.37 | .02* |  |  | 4.93 | 1.96 | 1.09 | 8.76 | .02* |  |

*Note.* Complete Case model was fitted on 260 observations made on 52 participants. Intention to Treat model was fitted on 285 observations made on 61 participants. SE = Standard Error. LCI = Lower Confidence Interval. UCI = Upper confidence Interval. Significance codes *** p < .001; ** p < .01; * p < .05.

**Table S7**

*Estimates for the model on Intensity of demand*

|  | **Complete Case** | | | |  | **Intention to Treat** | | | |
| --- | --- | --- | --- | --- | --- | --- | --- | --- | --- |
|  | RR | 95% LCI | 95% UCI | *p* |  | RR | 95% LCI | 95% UCI | *p* |
| Group, Ref = CET | 0.74 | 0.54 | 1.02 | .07 |  | 0.75 | 0.56 | 1.00 | .05 |
| Session, Ref = S1 |  |  |  |  |  |  |  |  |  |
| S2 | 0.95 | 0.82 | 1.09 | .45 |  | 0.93 | 0.81 | 1.07 | .31 |
| S3 | 0.99 | 0.86 | 1.42 | .88 |  | 0.97 | 0.84 | 1.11 | .63 |
| S4 | 0.93 | 0.80 | 1.07 | .31 |  | 0.92 | 0.79 | 1.06 | .24 |
| S5 | 0.83 | 0.72 | 0.97 | .02* |  | 0.83 | 0.71 | 0.96 | .01* |
| Group X Session |  |  |  |  |  |  |  |  |  |
| EFT & S2 | 1.07 | 0.86 | 1.33 | .53 |  | 1.08 | 0.89 | 1.32 | .42 |
| EFT & S3 | 1.00 | 0.81 | 1.24 | 99 |  | 1.00 | 0.82 | 1.23 | .98 |
| EFT & S4 | 1.02 | 0.82 | 1.26 | .86 |  | 1.03 | 0.83 | 1.26 | .80 |
| EFT & S5 | 1.06 | 0.85 | 1.32 | .60 |  | 1.06 | 0.86 | 1.32 | .58 |
| Age | 0.91 | 0.77 | 1.08 | .27 |  | 0.93 | 0.80 | 1.09 | .37 |
| Sex, Ref = Female | 1.23 | 0.91 | 1.66 | .17 |  | 1.33 | 1.01 | 1.74 | .04* |
| AUDIT Score | 1.02 | 0.86 | 1.22 | .78 |  | 1.06 | 0.90 | 1.23 | .49 |
| Education, Ref = High School (9+ years) |  |  |  |  |  |  |  |  |  |
| College (13+ years) | 1.05 | 0.70 | 1.59 | .80 |  | 0.99 | 0.69 | 1.41 | .96 |
| Graduate School (17+ years) | 0.79 | 0.46 | 1.35 | .39 |  | 0.76 | 0.46 | 1.26 | .29 |
| Income, Ref = Less than $5,000 |  |  |  |  |  |  |  |  |  |
| $5,000 - $24,999 | 1.51 | 0.89 | 2.53 | .12 |  | 1.54 | 0.95 | 2.48 | .08 |
| $25,000 - $49,999 | 1.21 | 0.74 | 1.97 | .45 |  | 1.25 | 0.78 | 2.00 | .34 |
| $50,000 - $74,999 | 0.89 | 0.51 | 1.57 | .70 |  | 0.90 | 0.53 | 1.55 | .72 |
| $75,000 -$99,999 | 1.32 | 0.74 | 2.36 | .34 |  | 1.39 | 0.81 | 2.40 | .23 |
| $100,000 + | 1.34 | 0.73 | 2.46 | .45 |  | 1.35 | 0.75 | 2.42 | .31 |
| No response | 2.07 | 0.72 | 5.91 | .17 |  | 1.91 | 0.69 | 5.26 | .21 |

*Note.* The Complete Case model was fitted on 260 observations made on 52 participants. The Intention to Treat model was fitted on 285 observations made on 61 participants. Age and AUDIT scores were scaled. LCI = Lower Confidence Interval. UCI = Upper confidence Interval. Significance codes *** p < .001; ** p < .01; * p < .05.

**Table S8**

*Estimates for the model on ln(alpha)*

|  | **Complete Case** | | | | | |  | **Intention to Treat** | | | | | |
| --- | --- | --- | --- | --- | --- | --- | --- | --- | --- | --- | --- | --- | --- |
|  | Coef. | SE | 95% LCI | 95% UCI | *p* | Cohen’s f |  | Coef. | SE | 95% LCI | 95% UCI | *p* | Cohen’s f |
| Group, Ref = CET | 0.00 | 0.00 | -0.01 | 0.01 | .67 | 0.02 |  | 0.00 | 0.00 | -0.01 | 0.01 | .85 | 0.02 |
| Session, Ref = S1 |  |  |  |  |  | 0.13 |  |  |  |  |  |  | 0.12 |
| S2 | 0.00 | 0.00 | -0.01 | 0.01 | .91 |  |  | 0.00 | 0.00 | -0.01 | 0.01 | .77 |  |
| S3 | 0.00 | 0.00 | -0.01 | 0.01 | .91 |  |  | 0.00 | 0.00 | -0.01 | 0.01 | .75 |  |
| S4 | 0.00 | 0.00 | -0.01 | 0.01 | .97 |  |  | 0.00 | 0.00 | -0.01 | 0.01 | .90 |  |
| S5 | 0.00 | 0.00 | -0.01 | 0.01 | .98 |  |  | 0.00 | 0.00 | -0.01 | 0.01 | .88 |  |
| Group X Session |  |  |  |  |  | 0.13 |  |  |  |  |  |  | 0.12 |
| EFT & S2 | 0.00 | 0.00 | -0.01 | 0.01 | .80 |  |  | 0.00 | 0.00 | -0.01 | 0.01 | .92 |  |
| EFT & S3 | 0.00 | 0.00 | -0.01 | 0.01 | .82 |  |  | 0.00 | 0.00 | -0.01 | 0.01 | .99 |  |
| EFT & S4 | 0.01 | 0.00 | 0.00 | 0.02 | .12 |  |  | 0.01 | 0.00 | 0.00 | 0.02 | .17 |  |
| EFT & S5 | 0.00 | 0.00 | -0.01 | 0.01 | .92 |  |  | 0.00 | 0.00 | -0.01 | 0.01 | .92 |  |
| Age | 0.00 | 0.00 | 0.00 | 0.00 | .66 | 0.08 |  | 0.00 | 0.00 | 0.00 | 0.00 | .57 | 0.09 |
| Sex, Ref = Female | 0.00 | 0.00 | -0.01 | 0.00 | .57 | 0.10 |  | 0.00 | 0.00 | -0.01 | 0.00 | .38 | 0.14 |
| AUDIT Score | 0.00 | 0.00 | 0.00 | 0.01 | .10 | 0.30 |  | 0.00 | 0.00 | 0.00 | 0.01 | .07 | 0.28 |
| Education, Ref = High School (9+ years) |  |  |  |  |  | 0.23 |  |  |  |  |  |  | 0.24 |
| College (13+ years) | 0.00 | 0.00 | -0.01 | 0.00 | .22 |  |  | 0.00 | 0.00 | -0.01 | 0.00 | .16 |  |
| Graduate School (17+ years) | -0.01 | 0.00 | -0.02 | 0.00 | .25 |  |  | -0.01 | 0.00 | -0.01 | 0.00 | .19 |  |
| Income, Ref = Less than $5,000 |  |  |  |  |  | 0.48 |  |  |  |  |  |  | 0.47 |
| $5,000 - $24,999 | -0.01 | 0.00 | -0.02 | 0.00 | .03* |  |  | -0.01 | 0.00 | -0.02 | 0.00 | .01* |  |
| $25,000 - $49,999 | -0.01 | 0.00 | -0.02 | 0.00 | .03* |  |  | -0.01 | 0.00 | -0.02 | 0.00 | .01* |  |
| $50,000 - $74,999 | -0.01 | 0.01 | -0.02 | 0.00 | .07 |  |  | -0.01 | 0.00 | -0.02 | 0.00 | .04* |  |
| $75,000 -$99,999 | -0.01 | 0.01 | -0.02 | 0.00 | .07 |  |  | -0.01 | 0.00 | -0.02 | 0.00 | .03* |  |
| $100,000 + | -0.01 | 0.01 | -0.02 | 0.01 | .34 |  |  | -0.01 | 0.01 | -0.02 | 0.00 | .30 |  |
| No response | -0.02 | 0.01 | -0.03 | 0.00 | .11 |  |  | -0.02 | 0.01 | -0.03 | 0.00 | .09 |  |

*Note.* The Complete Case model was fitted on 251 observations made on 52 participants. The Intention to Treat model was fitted on 276 observations made on 61 participants. Age and AUDIT scores were scaled. LCI = Lower Confidence Interval. UCI = Upper confidence Interval. Significance codes *** p < .001; ** p < .01; * p < .05.

**Table S9**

*Estimates for the model on Omax*

|  | **Complete Case** | | | | | |  | **Intention to Treat** | | | | | |
| --- | --- | --- | --- | --- | --- | --- | --- | --- | --- | --- | --- | --- | --- |
|  | Coef. | SE | 95% LCI | 95% UCI | *p* | Cohen’s f |  | Coef. | SE | 95% LCI | 95% UCI | *p* | Cohen’s f |
| Group, Ref = CET | 1.74 | 16.89 | -31.36 | 34.84 | .92 | 0.06 |  | -18.06 | 16.28 | -49.97 | 13.84 | .27 | 0.17 |
| Session, Ref = S1 |  |  |  |  |  | 0.16 |  |  |  |  |  |  | 0.18 |
| S2 | 0.10 | 7.03 | -13.67 | 13.87 | .99 |  |  | -12.05 | 7.83 | -27.41 | 3.30 | .13 |  |
| S3 | -3.75 | 7.03 | -17.52 | 10.02 | .59 |  |  | -11.67 | 8.05 | -27.45 | 4.10 | .15 |  |
| S4 | 7.29 | 7.03 | -6.48 | 21.06 | .30 |  |  | -0.01 | 8.27 | -16.22 | 16.19 | <.99 |  |
| S5 | -6.04 | 7.03 | -19.81 | 7.73 | .39 |  |  | -13.34 | 8.27 | -29.55 | 2.86 | .11 |  |
| Group X Session |  |  |  |  |  | 0.12 |  |  |  |  |  |  | 0.09 |
| EFT & S2 | -8.19 | 9.57 | -26.96 | 10.57 | .39 |  |  | 5.04 | 10.65 | -15.84 | 25.91 | .64 |  |
| EFT & S3 | -5.50 | 9.57 | -24.27 | 13.27 | .57 |  |  | 3.07 | 10.92 | -18.33 | 24.47 | .78 |  |
| EFT & S4 | -16.38 | 9.57 | -35.15 | 2.38 | .09 |  |  | -7.97 | 11.14 | -29.80 | 13.85 | .47 |  |
| EFT & S5 | -5.74 | 9.57 | -24.51 | 13.02 | .55 |  |  | 2.32 | 11.25 | -19.73 | 24.36 | .84 |  |
| Age | -1.49 | 9.00 | -19.13 | 16.15 | .87 | 0.03 |  | -2.74 | 8.72 | -19.84 | 14.36 | .75 | 0.05 |
| Sex, Ref = Female | 21.98 | 15.99 | -9.37 | 53.32 | .18 | 0.22 |  | 10.45 | 15.16 | -19.27 | 40.16 | .49 | 0.10 |
| AUDIT Score | -4.96 | 9.56 | -23.69 | 13.77 | .61 | 0.08 |  | 3.18 | 8.69 | -13.85 | 20.21 | .72 | 0.05 |
| Education, Ref = High School (9+ years) |  |  |  |  |  | 0.11 |  |  |  |  |  |  | 0.18 |
| College (13+ years) | -14.91 | 22.13 | -58.29 | 28.47 | .50 |  |  | -24.75 | 20.10 | -64.15 | 14.66 | .22 |  |
| Graduate School (17+ years) | -16.21 | 28.80 | -72.66 | 40.23 | .58 |  |  | -21.65 | 27.76 | -76.07 | 32.77 | .44 |  |
| Income, Ref = Less than $5,000 |  |  |  |  |  | 0.38 |  |  |  |  |  |  | 0.31 |
| $5,000 - $24,999 | 2.82 | 27.59 | -51.27 | 56.90 | .92 |  |  | 15.21 | 26.63 | -36.99 | 67.41 | .57 |  |
| $25,000 - $49,999 | 14.02 | 25.91 | -36.77 | 64.80 | .59 |  |  | 11.23 | 26.01 | -39.75 | 62.22 | .67 |  |
| $50,000 - $74,999 | 53.99 | 29.82 | -4.46 | 112.43 | .08 |  |  | 49.74 | 29.85 | -8.76 | 108.24 | .10 |  |
| $75,000 -$99,999 | 37.56 | 30.87 | -22.94 | 98.05 | .23 |  |  | 40.19 | 30.49 | -19.57 | 99.94 | .19 |  |
| $100,000 + | 12.08 | 31.81 | -50.26 | 74.42 | .71 |  |  | 22.26 | 32.20 | -40.85 | 85.37 | .49 |  |
| No response | 27.30 | 57.01 | -84.43 | 139.03 | .63 |  |  | 12.73 | 57.93 | -100.81 | 126.26 | .83 |  |

*Note.* The Complete Case model was fitted on 260 observations made on 52 participants. The Intention to Treat model was fitted on 285 observations made on 61 participants. Age and AUDIT scores were scaled. LCI = Lower Confidence Interval. UCI = Upper confidence Interval. Significance codes *** p < .001; ** p < .01; * p < .05.

**Table S10**

*Estimates for the model on Pmax*

|  | **Complete Case** | | | | | | |  | **Intention to Treat** | | | | | |
| --- | --- | --- | --- | --- | --- | --- | --- | --- | --- | --- | --- | --- | --- | --- |
|  | Coef. | | SE | 95% LCI | 95% UCI | *p* | Cohen’s f |  | Coef. | SE | 95% LCI | 95% UCI | *p* | Cohen’s f |
| Group, Ref = CET | 7.30 | 5.40 | | -3.29 | 17.90 | .18 | 0.21 |  | 0.70 | 5.24 | -9.57 | 10.98 | .89 | 0.002 |
| Session, Ref = S1 |  |  | |  |  |  |  |  |  |  |  |  |  | 0.20 |
| S2 | -2.81 | 3.37 | | -9.42 | 3.79 | .40 | 0.20 |  | -2.77 | 3.11 | -8.86 | 3.33 | .37 |  |
| S3 | -5.52 | 3.37 | | -12.13 | 1.08 | .10 |  |  | -6.02 | 3.19 | -12.28 | 0.24 | .06 |  |
| S4 | -2.92 | 3.37 | | -9.52 | 3.69 | .39 |  |  | -3.65 | 3.28 | -10.07 | 2.78 | .27 |  |
| S5 | -3.71 | 3.37 | | -10.31 | 2.90 | .27 |  |  | -4.44 | 3.28 | -10.87 | 1.99 | .18 |  |
| Group X Session |  |  | |  |  |  | 0.09 |  |  |  |  |  |  | 0.07 |
| EFT & S2 | -0.54 | 4.59 | | -9.55 | 8.46 | .91 |  |  | -0.23 | 4.23 | -8.52 | 8.05 | .96 |  |
| EFT & S3 | 0.65 | 4.59 | | -8.36 | 9.65 | .89 |  |  | 1.62 | 4.33 | -6.86 | 10.11 | .71 |  |
| EFT & S4 | -3.42 | 4.59 | | -12.42 | 5.58 | .46 |  |  | -2.05 | 4.42 | -10.71 | 6.60 | .64 |  |
| EFT & S5 | -3.79 | 4.59 | | -12.79 | 5.21 | .41 |  |  | -2.57 | 4.46 | -11.31 | 6.17 | .57 |  |
| Age | -1.73 | 2.61 | | -6.85 | 3.39 | .51 | 0.11 |  | -1.53 | 2.66 | -6.75 | 3.68 | .57 | 0.09 |
| Sex, Ref = Female | 2.92 | 4.62 | | -6.15 | 11.98 | .53 | 0.10 |  | -2.31 | 4.63 | -11.37 | 6.76 | .62 | 0.07 |
| AUDIT Score | -2.54 | 2.72 | | -7.86 | 2.79 | .36 | 0.15 |  | -0.65 | 2.65 | -5.85 | 4.55 | .81 | 0.04 |
| Education, Ref = High School (9+ years) |  |  | |  |  |  | 0.26 |  |  |  |  |  |  | 0.32 |
| College (13+ years) | -10.38 | 6.40 | | -22.93 | 2.16 | .11 |  |  | -13.34 | 6.15 | -25.39 | -1.29 | .04* |  |
| Graduate School (17+ years) | -9.70 | 8.33 | | -26.02 | 6.62 | .25 |  |  | -11.80 | 8.47 | -28.40 | 4.79 | .17 |  |
| Income, Ref = Less than $5,000 |  |  | |  |  |  | 0.50 |  |  |  |  |  |  | 0.42 |
| $5,000 - $24,999 | -1.80 | 7.98 | | -17.44 | 13.83 | .82 |  |  | 1.74 | 8.12 | -14.17 | 17.65 | .83 |  |
| $25,000 - $49,999 | 2.28 | 7.49 | | -12.40 | 16.97 | .76 |  |  | 0.59 | 7.92 | -14.93 | 16.11 | .94 |  |
| $50,000 - $74,999 | 11.75 | 8.62 | | -5.15 | 28.65 | .18 |  |  | 12.32 | 9.09 | -5.49 | 30.13 | .18 |  |
| $75,000 -$99,999 | 9.40 | 8.92 | | -8.09 | 26.89 | .30 |  |  | 7.85 | 9.29 | -10.36 | 26.06 | .40 |  |
| $100,000 + | 12.84 | 9.20 | | -5.19 | 30.86 | .17 |  |  | 14.61 | 9.80 | -4.60 | 33.82 | .14 |  |
| No response | 36.19 | 16.48 | | 3.89 | 68.50 | .03* |  |  | 30.28 | 17.63 | -4.27 | 64.83 | .09 |  |

*Note.* The Complete Case model was fitted on 260 observations made on 52 participants. The Intention to Treat model was fitted on 285 observations made on 61 participants. Age and AUDIT scores were scaled. LCI = Lower Confidence Interval. UCI = Upper confidence Interval. Significance codes *** p < .001; ** p < .01; * p < .05.

**Table S11**

*Estimates for the models on Drinks/Day*

|  | **Complete Case** | | | |  | **Intention to Treat** | | | |
| --- | --- | --- | --- | --- | --- | --- | --- | --- | --- |
|  | RR | 95% LCI | 95% UCI | *p* |  | RR | 95% LCI | 95% UCI | *p* |
| Group, Ref = CET | 1.04 | 0.81 | 1.33 | .76 |  | 1.06 | 0.83 | 1.35 | .64 |
| Phase, Ref = Baseline |  |  |  |  |  |  |  |  |  |
| Phase 1 | 0.91 | 0.85 | 0.97 | <.01** |  | 0.91 | 0.85 | 0.97 | <.01** |
| Phase 2 | 1.01 | 0.94 | 1.09 | .69 |  | 1.00 | 0.94 | 1.07 | .95 |
| Group X Phase |  |  |  |  |  |  |  |  |  |
| Phase 1 & EFT | 1.00 | 0.91 | 1.10 | .96 |  | 1.01 | 0.93 | 1.10 | .73 |
| Phase 2 & EFT | 0.79 | 0.72 | 0.87 | <.001*** |  | 0.81 | 0.74 | 0.89 | <.001*** |
| Age | 1.20 | 1.05 | 1.37 | <.01** |  | 1.19 | 1.04 | 1.36 | .01* |
| Sex, Ref = Female | 1.40 | 1.10 | 1.78 | <.01** |  | 1.50 | 1.17 | 1.91 | <.01** |
| AUDIT Score | 0.97 | 0.84 | 1.12 | .72 |  | 0.96 | 0.84 | 1.11 | .60 |
| Education, Ref = High School (9+ years) |  |  |  |  |  |  |  |  |  |
| College (13+ years) | 1.42 | 1.01 | 1.98 | .04* |  | 1.56 | 1.13 | 2.16 | <.01** |
| Graduate School (17+ years) | 1.24 | 0.80 | 1.92 | .33 |  | 1.37 | 0.87 | 2.14 | .17 |
| Income, Ref = Less than $5,000 |  |  |  |  |  |  |  |  |  |
| $5,000 - $24,999 | 1.75 | 1.15 | 2.66 | <.01** |  | 1.66 | 1.08 | 2.56 | .02* |
| $25,000 - $49,999 | 1.73 | 1.17 | 2.57 | <.01** |  | 1.71 | 1.12 | 2.61 | .01* |
| $50,000 - $74,999 | 1.39 | 0.89 | 2.19 | .15 |  | 1.36 | 0.84 | 2.20 | .21 |
| $75,000 -$99,999 | 1.42 | 0.89 | 2.27 | .14 |  | 1.46 | 0.89 | 2.39 | .13 |
| $100,000 + | 1.11 | 0.69 | 1.80 | .67 |  | 1.08 | 0.64 | 1.81 | .78 |
| No response | 2.68 | 1.14 | 6.30 | .02* |  | 2.93 | 1.16 | 7.43 | .02* |

*Note.* The Complete Case model was fitted on 2,099 observations made on 52 participants. The Intention to Treat model was fitted on 2,381 observations made on 61 participants. Age and AUDIT scores were scaled. LCI = Lower Confidence Interval. UCI = Upper confidence Interval. Significance codes *** p < .001; ** p < .01; * p < .05.

**Table S12**

*Estimates for the models on Drinks/Drinking Day*

|  | **Complete Case** | | | |  | **Intention to Treat** | | | |
| --- | --- | --- | --- | --- | --- | --- | --- | --- | --- |
|  | RR | 95% LCI | 95% UCI | *p* |  | RR | 95% LCI | 95% UCI | *p* |
| Group, Ref = CET | 1.05 | 0.87 | 1.26 | .60 |  | 1.03 | 0.87 | 1.22 | .73 |
| Phase, Ref = Baseline |  |  |  |  |  |  |  |  |  |
| Phase 1 | 0.97 | 0.91 | 1.04 | .42 |  | 0.97 | 0.90 | 1.03 | .31 |
| Phase 2 | 1.04 | 0.96 | 1.11 | .32 |  | 1.03 | 0.96 | 1.10 | .42 |
| Group X Phase |  |  |  |  |  |  |  |  |  |
| Phase 1 & EFT | 0.94 | 0.86 | 1.03 | .20 |  | 0.95 | 0.87 | 1.03 | .22 |
| Phase 2 & EFT | 0.86 | 0.78 | 0.95 | <.01** |  | 0.87 | 0.79 | 0.96 | <.01** |
| Age | 1.04 | 0.95 | 1.15 | .35 |  | 1.03 | 0.94 | 1.33 | .50 |
| Sex, Ref = Female | 1.35 | 1.13 | 1.61 | <.001*** |  | 1.34 | 1.13 | 1.59 | <.001*** |
| AUDIT Score | 1.07 | 0.96 | 1.18 | .23 |  | 1.06 | 0.96 | 1.17 | .22 |
| Education, Ref = High School (9+ years) |  |  |  |  |  |  |  |  |  |
| College (13+ years) | 1.45 | 1.14 | 1.85 | <.01** |  | 1.39 | 1.11 | 1.73 | <.01** |
| Graduate School (17+ years) | 1.36 | 0.99 | 1.86 | .06 |  | 1.32 | 0.97 | 1.79 | .07 |
| Income, Ref = Less than $5,000 |  |  |  |  |  |  |  |  |  |
| $5,000 - $24,999 | 1.79 | 1.32 | 2.43 | <.001*** |  | 1.69 | 1.26 | 2.27 | <.001*** |
| $25,000 - $49,999 | 1.53 | 1.15 | 2.03 | <.01** |  | 1.55 | 1.16 | 2.06 | <.01** |
| $50,000 - $74,999 | 1.42 | 1.02 | 1.97 | .04* |  | 1.37 | 0.98 | 1.90 | .06 |
| $75,000 -$99,999 | 1.44 | 1.03 | 2.03 | .03* |  | 1.55 | 1.11 | 2.17 | .01* |
| $100,000 + | 1.20 | 0.85 | 1.71 | .30 |  | 1.22 | 0.86 | 1.75 | .26 |
| No response | 2.48 | 1.34 | 4.61 | <.01** |  | 2.44 | 1.30 | 4.58 | <.01** |

*Note.* The Complete Case model was fitted on 1,789 observations made on 52 participants. The Intention to Treat model was fitted on 1,984 observations made on 61 participants. Age and AUDIT scores were scaled. LCI = Lower Confidence Interval. UCI = Upper confidence Interval. Significance codes *** p < .001; ** p < .01; * p < .05.

**Table S13.** Daily submission rates

|  | Complete Case  (n=52) | |  | Intention to Treat  (n=61) | |
| --- | --- | --- | --- | --- | --- |
|  | EFT | CET |  | EFT | CET |
| **Drink submission rates** |  |  |  |  |  |
| Baseline | 87.1% | 89.7% |  | 88.6% | 89.7% |
| Monitoring Phase 1 | 85.6% | 88.2% |  | 88.3% | 87.6% |
| Monitoring Phase 2 | 76.0% | 78.0% |  | 76.6% | 80.1% |
| **BAC submission rates** |  |  |  |  |  |
| Baseline | 55.9% | 56.5% |  | 57.8% | 57.8% |
| Monitoring Phase 1 | 52.6% | 52.8% |  | 52.1% | 53.3% |
| Monitoring Phase 2 | 42.5% | 45.2% |  | 40.2% | 45.5% |

*Note.* Submission rates were calculated based on the 52 participants who completed the intervention (complete case) and for all participants who started the intervention (n=61).

**Table S14.** Matrix of breath samples and self-reported drink counts for all participants who started the intervention (n=61).

**Correlation between the reported drinking days and the biochemically validated breath data**

Results from the Fisher’s exact test including all participants who started the intervention (n=61) showed a significant association (OR: 19.28; *p*<.001) between breath sample results (positive or negative sample) and drink counts (positive or negative drink count), where the odds of a positive breath sample was about 19 times higher when participants reported at least one drink compared to zero drinks. Additionally, the AUC for the ROC curve was 0.79, indicating moderate discrimination. Table S14 shows the matrix comparing breath sample and drink count results for the intention-to-treat sample.

**Table S15**

*Estimates for models for missing daily drinks*

|  | **Complete Case** | | | | **Intention to Treat** | | | | |
| --- | --- | --- | --- | --- | --- | --- | --- | --- | --- |
|  | RR | 95% LCI | 95% UCI | *p* |  | RR | 95% LCI | 95% UCI | *p* |
| Phase, Ref = BL |  |  |  |  |  |  |  |  |  |
| Monitoring  Phase 1 | 1.23 | 0.89 | 1.69 | .22 |  | 1.21 | 0.91 | 1.62 | .19 |
| Monitoring  Phase 2 | 2.88 | 2.14 | 3.88 | <.001*** |  | 2.90 | 2.20 | 3.81 | <.001*** |

*Note.* Complete Casemodel was fitted on 2,519 observations made on 52 participants. Intention to Treat model was fitted on 2,871 observations made on 61 participants. LCI = Lower Confidence Interval. UCI = Upper confidence Interval. Significance codes *** p < .001; ** p < .01; * p < .05.

**Table S16**

*Estimates for models for missing daily breath samples*

|  | **Complete Case** | | | | | **Intention to Treat** | | | | |
| --- | --- | --- | --- | --- | --- | --- | --- | --- | --- | --- |
|  | RR | 95% LCI | 95% UCI | *p* |  | | RR | 95% LCI | 95% UCI | *p* |
| Phase, Ref = BL |  |  |  |  |  | |  |  |  |  |
| Monitoring  Phase 1 | 1.28 | 1.13 | 1.45 | <.001*** |  | | 1.36 | 1.21 | 1.53 | <.001*** |
| Monitoring  Phase 2 | 2.29 | 2.01 | 2.60 | <.001*** |  | | 2.45 | 2.16 | 2.76 | <.001*** |

*Note.* Complete Case model was fitted on 8,529 observations made on 52 participants. Intention to Treat model was fitted on 9,663 observations made on 61 participants. LCI = Lower Confidence Interval. UCI = Upper confidence Interval. Significance codes *** p < .001; ** p < .01; * p < .05.
